***Functional asymmetry in the central brain regions in boys with  
Attention Deficit Hyperactivity Disorder detected by Event  
Related Potentials during performance of the Attentional  
Network Test***

Dimitri Marques Abramov, Carlos Alberto Mourão Jr.\*, Carla Quero Cunha, Monique Castro Pontes, Paulo Ricardo Galhanone, Leonardo C. deAzevedo, Vladimir V. Lazarev.

Laboratory of Neurobiology and Clinical Neurophysiology, National Institute of Women, Children and Adolescents Health Fernandes Figueira – Oswaldo Cruz Foundation.

(\*) Laboratory of Psychophysiology, Institute of Biological Sciences, Federal University of Juiz de Fora.

Corresponding Author:

Dimitri Marques Abramov

Instituto Nacional da Saúde da Mulher, da Criança e do Adolescente Fernandes Figueira, Fundação Oswaldo Cruz

Av. Ruy Barbosa, 716, Flamengo, Rio de Janeiro, RJ

Postal Code: 22.250-020

Phone: +55 21 2554-1955, +55 21 2554-18

E-mail: [dimitri.abramov@iff.fiocruz.br](mailto:dimitri.abramov@iff.fiocruz.br)

## Abstract

**Background:** Various functional asymmetries detected by different neurophysiological and neuroimaging methods have been reported in the literature on the Attention Deficit Hyperactivity Disorder (ADHD), some of them pointing to the right hemisphere activity. In our attempt to discriminate the ADHD patients from normal subjects by hierarchical clustering of behavioural, psychological and event related potential (ERP) variables, the late P3 component of potentials from the right central region (C4) proved to be one of the most informative parameters (in preparation for publication). Here, we have studied the differences in ERPs between the left (C3) and right (C4) central leads and relation of this asymmetry to ADHD diagnosed using DSM.

**Methods:** 16 typically developing (TD) boys and 16 boys diagnosed with ADHD according to DSM-IV-TR, aged 10-13 years, were examined by the Attentional Network Test (ANT), with simultaneous recording of the respective ERPs. The intergroup differences in the ERP amplitude parameters in the left (C3) and right (C4) central channels and in the difference in these parameters between the two channels ('C3 minus C4') were accessed. These characteristics were compared to the subjects' DSM scores and ANT performance.

**Results:** The target-related potentials' late characteristics from the C4 showed significant difference between the groups, while no difference was observed for the C3. Only in the ADHD patients, both the left and right late target ERP characteristics correlated with the reaction time, while the DSM scores did not show any correlations in both groups. The difference between ERPs of the C3 and C4 channels inside the interval of 40-290 ms after target onset was positive in the ADHD group and negative in the control group. This asymmetry correlated with DSM scores, mainly to hyperactive and impulsive criteria.

**Conclusion:** In ADHD patients, the results suggest ERP pattern of right-side functional predominance in the motor control, which correlates to DSM scores, mainly to hyperactive and impulsive criteria.

## 1. Introduction

The cerebral mechanisms of the Attention Deficit Hyperactivity Disorder (ADHD) have been related to the alterations in the frontal executive control upon sensory-motor functions (1, 2, 3). Some evidences of asymmetric character of these alterations were found in the right frontal lobe, both in the prefrontal cortex (4) and deeper, in the caudate nucleus (5), where the neuroimaging data correlated with the Diagnostic and Statistical Manual of Mental Disorders (DSM) scores. The cortico-caudate circuits are largely involved in the behavior and motor control (6, 7). ADHD and hiperkinetic disorders, (8), as well as other movement disorders (9) correlate with cortico-striatal alterations. A striking feature of ADHD patients is their behavioral hyperactivity and impulsivity (1,8), which serve criteria for ADHD diagnosis in the DSM (10, 11).

In our previous EEG research, we also observed the asymmetrical differences between ADHD and control groups, with the signs of relative inactivation of the left fronto-temporal cortex known as responsible for the voluntary attention (Lazarev et al., 2016). This left-side 'inactivation' could be compensated by relatively higher activation of the contralateral cortex. This can partially explain the leading role of the ERP data from the right fronto-temporal and particularly right central motor regions in discriminating the ADHD patients from the control subjects by hierarchical clustering of behavioral, psychological and ERP variables observed in our other research (in preparation for publication).

Here, we have studied the scalp ERPs from the left and right central brain areas during performance of the Attentional Network Test (ANT), a forced two-choice test addressed to multiple dimensions of attention (vigilance, spatial orientation and conflict resolution) according to Posner's theory of Attentional Networks (12-17). In the ANT, motor performance, evidenced by reaction time (RT), is manipulated by the information contained in the cue and target stimuli (12). The ANT-related ERPs proved to be sensitive to ADHD (16).

The objective of this paper is a preliminary report about functional asymmetry in the central motor areas related to ADHD patients' behavior during the ANT performance. This is a partial presentation of the results, which are in preparation for publication and include ERPs data recorded from various cerebral areas.

## **2. Methodology**

### **2.1. Subjects.**

Thirty two boys, aged 10-13 years, were sampled according to DSM-IV-TR: 16 with ADHD and 20 typically developing (TD) subjects. All them were free of psychotropic medicines for the last 30 days, without history of neither chronic diseases nor psychiatric disorders, as screened by K-SADS-PL (18). Their estimated intelligence quotient (I.Q.) was  $> 80$  (see below). The study was approved by the Ethics Committee of our Institute. All the primary caregivers gave written informed consent after receiving a complete description of the study. The boys also gave their oral assent.

### **2.2. Clinical and psychological examination**

Each subject was evaluated by a structured interview where their caregivers were shown the DSM-IV-TR criteria, and were instructed to point out carefully whether or not each specific criterion was an exact characteristic of their children's

behavior. If there was any doubt or hesitation about any item, it was disregarded. Thus, subjects were classified in accordance with the DSM-IV-TR.

The I.Q. was estimated by Block Design and Vocabulary, subtests from the Wechsler Intelligence Scale for Children, 3<sup>rd</sup> version (WISC-III) (19, 20). In the previous study, the I.Q. scores estimated by these two subtests showed very high correlation with the results from the full WISC scale (20).

### 2.3. Experimental procedures

The ANT version adapted for children, with little fishes instead of traditional arrows, in line to Kratz et al. (15), were used. The ANT is a forced two-choice test where the subject is instructed to look fixedly at the central fixation point and observe the horizontal orientation of a target stimulus flanked by distractors (two similar fishes at each side, all with the same orientation) and preceded or not by a cue signal, which informs where and/or when the target appears. The horizontal orientation of the target to the right or to the left was equiprobable and the same (congruent) or opposite (incongruent) to the orientation of distractors. There were three equiprobable cue conditions corresponding to this signal's position or its non-appearance: 1) at the subsequent upper or lower position of the target - Spatial cue condition; 2) at the central fixation point - Neutral cue condition; or 3) No-cue condition. The subject had to press promptly with his index or middle finger the left or right arrow key of the keyboard, according to the target horizontal orientation. The target appeared for 350ms, 100 ms after the distractors. There was a random interval from 1 to 2 s between the trials. For more information, see the reference (16). In this study, the time interval between the cue and target presentations was 1650ms.

### 2.4. EEG acquisition

During the ANT performance, the subject's EEG was recorded by a Nihon Kohden NK1200 EEG System at paracentral (C3 and C4) sites according to the

International 10/20 system, with monopolar reference to the linked earlobes (A1+A2). The impedance was below 10 k $\Omega$ . The EEG was recorded at a 1000 Hz sampling rate and resolution of 16 bits, with low-pass (0.5 Hz), high-pass (100 Hz) and notch (60 Hz) filters.

## 2.5. Data analysis

Here we have focused only on the C3 and C4 leads, located over motor areas, about 5 cm to the left and to the right from the vertex, respectively (21). The target ERPs (triggered at the target onset) and the arithmetic difference between the left (C3) and right (C4) waves were subject to analysis.

For the target ERPs, we estimated the maximum peak amplitude and calculated the sum of all positive and negative amplitudes inside the time window at 160 – 830 ms after the target onset (marked with bold black lines in Figure 1), which embraced the late ERP component. The latter parameter called ‘total amplitude’ (TA) was equivalent to the mean amplitude. We also considered the same measures for the asymmetry between the waves in C3 and C4 (‘C3 minus C4’ channel) inside the time window at 45 – 290 ms (Figure 2). The above ERP parameters were estimated for each cue condition and for all of them together, and also for both congruent and incongruent target position. We compared DSM scores, peak amplitudes and TAs between the groups also using the Mann-Whitney U-test.

The correlation coefficients and their probabilities between the ERP characteristics and the mean RT or DSM scores were calculated using Pearson’s test ( $r$ ) for the group of all subjects.

## 3. Results

The ADHD and TD groups have presented significant difference in the most of DSM scores, except for hyperactivity ( $p = 0.063$ ) (Table 1).

In the ANT, the average RT for all conditions was not significantly different ( $p = 0.136$ ) between the control ( $0.55 \pm 0.12$  s) and ADHD ( $0.63 \pm 0.14$  s) groups.

The ERP waveforms for the ADHD and TD groups demonstrated contingent voltage variation during 1000 ms before the target onset, and both early (from 20 to 200 ms) and large late (from 160 to 830 ms) target-related components that appeared bilaterally. However, in the ADHD patients, the late component achieved its maximum positive amplitude level about 330 ms later than in the controls being negative during initial 200 ms, although the maximum peaks in both groups had similar latency  $\sim 600$  ms (Figure 1). Among the amplitude characteristics of the late ERP component, only the TA in C4 was significantly lower in the ADHD group ( $p = 0.006$ ) (Table 2). Other amplitude parameters did not show significant difference between the groups.

The TA in the C3 and C4 leads correlated with the RT of ADHD patients only (Table 3), without showing any significant correlation with the DSM scores. The peak amplitude did not correlate with either RT or DSM scores.

The amplitude difference between the left and right ERPs (channel 'C3 minus C4') during the period from 45 to 290 ms after the target onset proved to be positive in the ADHD group and negative in the control group (Figure 2). The TA of this asymmetry was statistically different between ADHD and control groups for all cue conditions ( $p < 0.05$ ), as well as for congruent and incongruent conditions separately ( $p < 0.01$ , table 2).

For the group of all subjects, the above-mentioned asymmetry from the 'C3 minus C4' channel correlated with the following DSM scores: total ( $r = 0.51$ ,  $p =$



0.002), hyperactive ( $r = 0.50$ ,  $p = 0.003$ ), impulsive ( $r = 0.45$ ,  $p = 0.009$ ) and inattentive ( $r = 0.37$ ,  $p = 0.034$ ) (Figure 3).

#### **4. Conclusion**

The ERPs of the motor cortical areas proved to be correlated with motor behavior (RT) only in the ADHD patients. In contrast to the late target-related potentials, which were lower in the ADHD group in the right hemisphere, the early components did not manifest significant differences between the groups. However, their interhemispheric asymmetry was statistically different between the ADHD and control subjects showing the right lower amplitude in the ADHD. Moreover, the early asymmetry correlated with the DSM scores, mainly the hyperactivity ones. This points to a more intrinsic biological association with the clinical phenomenology.

## References

- (1) Barkley, RA. Attention-deficit hyperactivity disorder. 3. New York: Guilford; 2006.
- (2) Craig F, Margari F, Legrottaglie AR, Palumbi R, de Giambattista C, Margari L. A review of executive function deficits in autism spectrum disorder and attention-deficit/hyperactivity disorder. *Neuropsychiatr Dis Treat*. 2016 May 12;12:1191-202.
- (3) Del Campo N, Chamberlain SR, Sahakian BJ, Robbins TW. The roles of dopamine and noradrenaline in the pathophysiology and treatment of attention-deficit/hyperactivity disorder. *Biol Psychiatry*. 2011 Jun 15;69(12):e145-57.
- (4) Langleben DD, Austin G, Krikorian G, Ridlehuber HW, Goris ML, Strauss HW. Interhemispheric asymmetry of regional cerebral blood flow in prepubescent boys with attention deficit hyperactivity disorder. *Nucl Med Commun*. 2001, 22(12):1333-40.
- (5) Dang LC, Samanez-Larkin GR, Young JS, Cowan RL, Kessler RM, Zald DH. Caudate asymmetry is related to attentional impulsivity and an objective measure of ADHD-like attentional problems in healthy adults. *Brain Struct Funct*. 2016, 221(1):277-86.
- (6) Bonelli RM, Cummings JL. Frontal-subcortical circuitry and behavior. *Dialogues Clin Neurosci*. 2007;9(2):141-51.
- (7) Haber SN. Corticostriatal circuitry. *Dialogues Clin Neurosci*. 2016 Mar;18(1):7-21
- (8) Swanson J, Castellanos FX, Murias M, LaHoste G, Kennedy J. Cognitive neuroscience of attention deficit hyperactivity disorder and hyperkinetic disorder. *Curr Opin Neurobiol*. 1998 Apr;8(2):263-71.

(9) Poston KL. Overview of rare movement disorders. *Continuum (Minneap Minn)*. 2010 Feb;16(1 Movement Disorders):49-76. doi: 10.1212/01.CON.0000348900.09963.bc.

(10) American Psychiatric Association (2013), *Diagnostic and Statistical Manual of Mental Disorders, Fifth Edition*, American Psychiatric Association: Arlington, VA.

(11) American Psychiatric Association (2000), *Diagnostic and Statistical Manual of Mental Disorders, Fourth Edition (Text Revision)*, American Psychiatric Association: Arlington, VA.

(12) Fan J, McCandliss BD, Sommer T, Raz A, Posner MI. Testing the efficiency and independence of attentional networks. *J Cogn Neurosci*. 2002 Apr 1;14(3):340-7

(13) Fan J, Posner M. Human attentional networks. *Psychiatr Prax*. 2004; 31 Suppl 2:S210-4

(14) Fan J, McCandliss BD, Fossella J, Flombaum JI, Posner MI. The activation of attentional networks. *NeuroImage* 2005, 26:471– 479.

(15) Petersen SE, Posner MI. The attention system of the human brain: 20 years after. *Annu Rev Neurosci*. 2012;35:73-89.

(16) Kratz O, Studer P, Malcherek S, Erbe K, Moll GH, Heinrich H. Attentional processes in children with ADHD: An event-related potential study using the attention network test. *Int J Psychophysiol*, 2011,81, 82–90

(17) A.H. Neuhaus, C. Urbanek, C. Opgen-Rhein, E. Hahn, T.M. Ta, S. Koehler, M. Gross, M. Dettling, Event-related potentials associated with Attention Network Test, *Int. J. Psychophysiol*. 76 (2010) 72-79.

(18) Matuschek T, Jaeger S, Stadelmann S, Dölling K, Grunewald M, Weis S, von Klitzing K, Döhnert M. Implementing the K-SADS-PL as a standard diagnostic tool: Effects on clinical diagnoses *Psychiatry Res*. 2016 Feb 28;236:119-24.

(19) D. Wechsler, *Wechsler Intelligence Scale for Children, Third Edition (WISC-III): Manual*, San Antonio, The Psychological Corporation, 1991.

(20) C. B. Mello, N. Argollo, B. P. M. Shayer, N. Abreu, K. Godinho, P. Durán, F. Vargem, M. Muszkat, M. C. Miranda, O. F. A. Bueno, Abbreviated version of the WISC-III: correlation between estimated IQ and global IQ of brazilian children, *Psic.: Teor. e Pesq.* 27 (2011) 149-155.

(21) Mortifee P, Stewart H, Schulzer M, Eisen A. Reliability of transcranial magnetic stimulation for mapping the human motor cortex. *Electroencephalogr Clin Neurophysiol* 1994;93:131–137.

(22) Wong AL, Haith AM, Krakauer JW. Motor Planning. *Neuroscientist*. 2015 Aug;21(4):385-98. doi: 10.1177/1073858414541484. Epub 2014 Jun 30.

(23) Ridderinkhof KR, Ullsperger M, Crone EA, Nieuwenhuis S. The role of the medial frontal cortex in cognitive control. *Science*. 2004 Oct 15;306(5695):443-7.

(24) Ullsperger M, Danielmeier C, Jocham G. Neurophysiology of performance monitoring and adaptive behavior. *Physiol Rev*. 2014 Jan;94(1):35-79. doi: 10.1152/physrev.00041.2012.

Table 1. Difference between control and ADHD groups in DSM-scores

| DSM criteria              | Control |         | ADHD  |         | p-value |
|---------------------------|---------|---------|-------|---------|---------|
|                           | Mean    | Std Dev | Mean  | Std Dev |         |
| Innattentive              | 2,19    | 1,68    | 7,25  | 1,39    | 0,000   |
| Hyperactivity             | 1,44    | 0,96    | 2,88  | 2,16    | 0,063   |
| Impulsivity               | 0,94    | 0,68    | 1,75  | 1,13    | 0,029   |
| Hyperactivity+Impulsivity | 2,31    | 1,40    | 4,63  | 3,05    | 0,027   |
| Total                     | 4,56    | 2,53    | 11,94 | 3,13    | 0,000   |

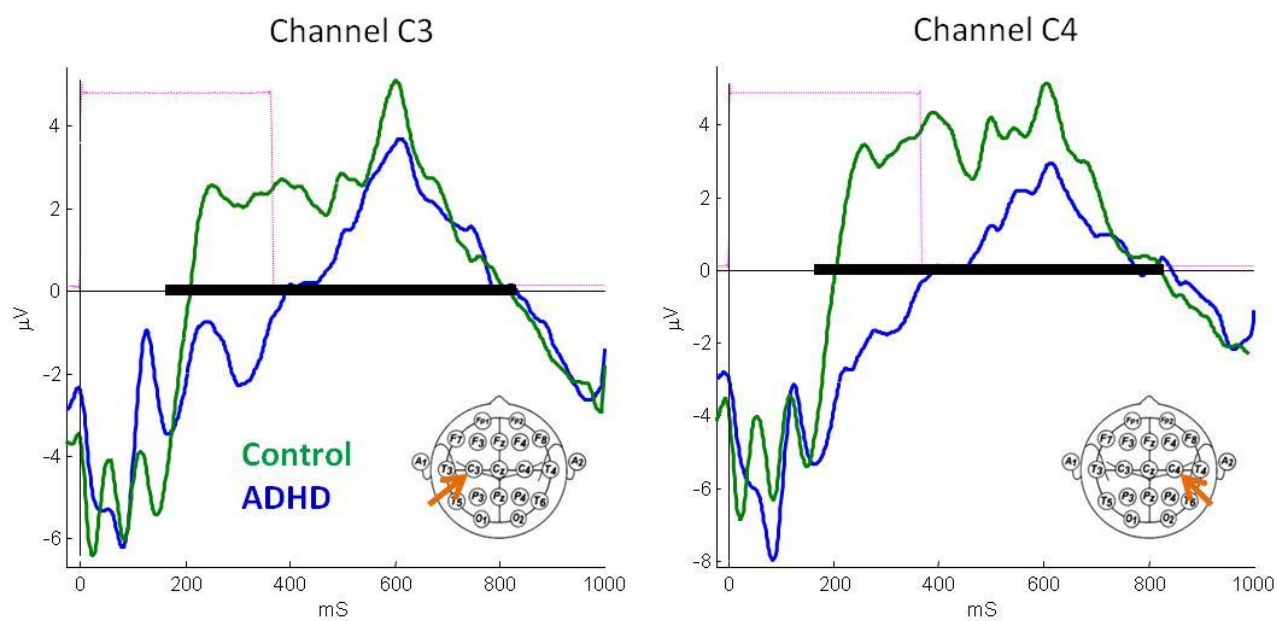

Figure 1. ERPs ( $\mu\text{V}$ ) for left (C3) and right (C4) central channels averaged across subjects of control (green) and ADHD (blue) groups. Bold black line on the abscissa shows time window with late ERP components. Thin magenta dotted line: trigger signal (target onset/offset)

Table 2. Group averaged total amplitude (sum of all amplitudes inside time window,  $\mu\text{V}$ ) of the target-related ERP early (\*) and late (\*\*) components inside the time windows of interest and statistical significance of differences between the groups

|                              | Control |                    | ADHD    |                    | p     |
|------------------------------|---------|--------------------|---------|--------------------|-------|
|                              | Mean    | Standard deviation | Mean    | Standard deviation |       |
| <b>Central channels</b>      |         |                    |         |                    |       |
| Left (C3), all conditions    | 815,09  | 851,43             | 202,15  | 923,55             | 0,073 |
| Right (C4), all conditions   | 1014,48 | 1131,22            | -37,46  | 1001,31            | 0,006 |
| <b>'C3 minus C4' channel</b> |         |                    |         |                    |       |
| All conditions               | 50,82   | 216,69             | -128,61 | 191,05             | 0,014 |
| No cue                       | 28,71   | 181,60             | -134,42 | 149,41             | 0,011 |
| Neutral cue                  | 37,38   | 203,23             | -113,94 | 146,49             | 0,033 |
| Spatial cue                  | 27,00   | 173,22             | -127,45 | 149,81             | 0,012 |
| Congruent target             | 27,18   | 179,58             | -125,27 | 138,36             | 0,004 |
| Incongruent target           | 34,97   | 171,13             | -125,35 | 154,95             | 0,008 |

(\*) 45 - 290 ms after target onset for 'C3 minus C4'

(\*\*) 160 - 830 ms after target onset for C3 and C4

Table 3. Spearman's Rank Correlation coefficients ( $\rho$ ) and probabilities of correlation ( $p$ ) between late ERP amplitude characteristics and reaction time (average for all ANT conditions)

|                     | Control |       | ADHD   |       |
|---------------------|---------|-------|--------|-------|
|                     | $\rho$  | $p$   | $\rho$ | $p$   |
| C3: Peak amplitude* | -0,19   | 0,489 | 0,64   | 0,008 |
| Total amplitude*    | -0,24   | 0,377 | 0,40   | 0,120 |
| C4: Peak amplitude  | -0,14   | 0,605 | 0,59   | 0,016 |
| Total amplitude     | -0,23   | 0,397 | 0,57   | 0,020 |

(\*) inside the window 160 - 830 ms



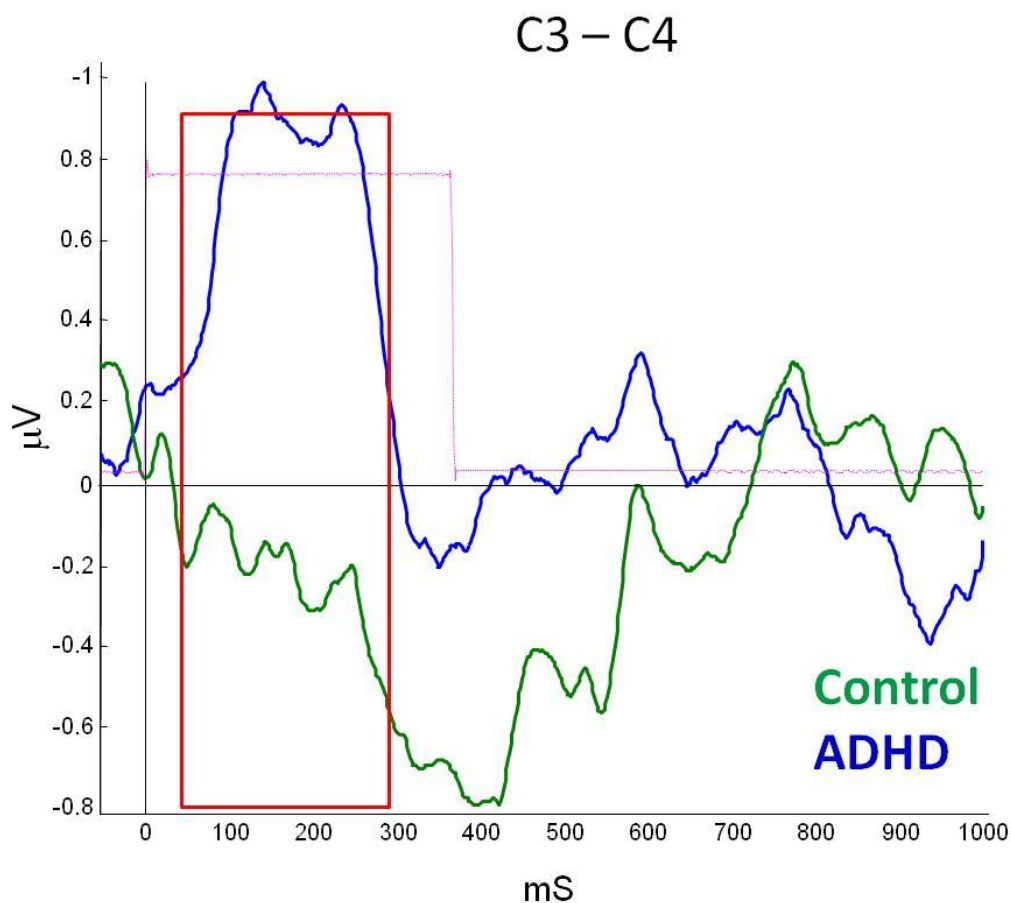

Figure 2. ERP asymmetry from 'C3 minus C4' channel, for control (green) and ADHD (blue) groups. The red box shows the time window of interest (45-290 ms). Thin magenta dotted line: trigger signal (target onset/offset)

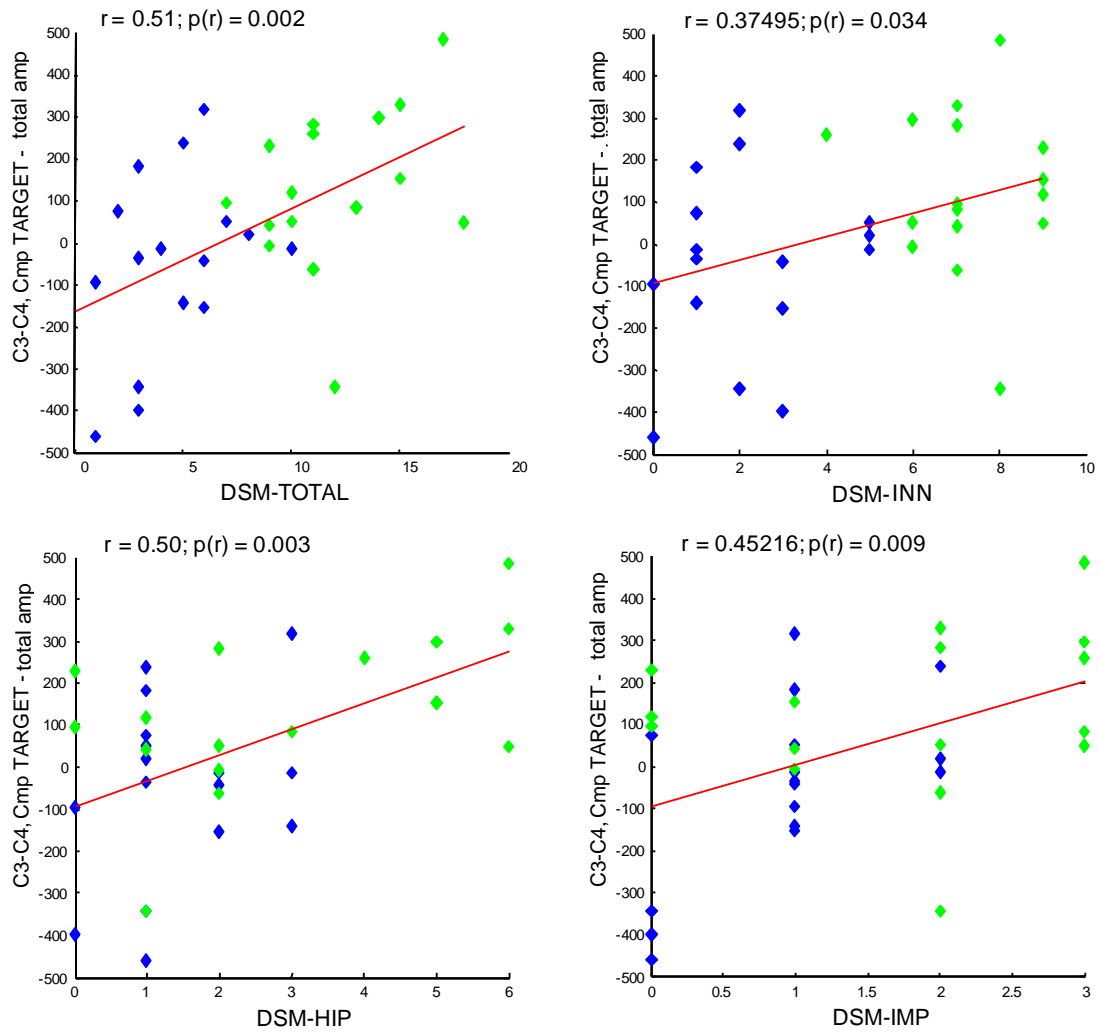

Figure 3. Scatterplots with regression models for correlation between DSM scores and the total amplitude of the ERP asymmetry from 'C3 minus C4' channel, for the time window of interest 45 – 290 ms. Pearson's correlation coefficients ( $r$ ) and probabilities of correlation ( $p$ ) were calculated for the group of all subjects. Blue: control group, green: ADHD group. Red line: regression model. DSM scores: INN, inattention; HIP, hyperactive; IMP, impulsiveness.
